# Supplementary material for: Uptake and Retention of Nanoplastics in Quagga Mussels
Source: PubMed Central journal article supplement (PMC7268195; doi:10.1002/gch2.201800104), 2019-07-02
Supplement: GCH2-4-1800104-s001.pdf [file GCH2-4-1800104-s001.pdf]

# Global Challenges

---

Open Access

## Supporting Information

for *Global Challenges*, DOI: 10.1002/gch2.201800104

### Uptake and Retention of Nanoplastics in Quagga Mussels

*Rachel L. Merzel, Lauren Purser, Taylor L. Soucy, Monica Olszewski, Isabel Colón-Bernal, Melissa Duhaime,\* Ashley K. Elgin,\* and Mark M. Banaszak Holl\**

**Supporting Information for**  
**Uptake and retention of nanoplastics in quagga mussels**

Rachel L. Merzel,<sup>1a</sup> Lauren Purser,<sup>1a</sup> Taylor L. Soucy,<sup>1a</sup> Monica Olszewski,<sup>1</sup> Isabel Colón-Bernal,<sup>1</sup> Melissa Duhaime,<sup>2\*</sup> Ashley K. Elgin,<sup>3\*</sup> Mark M. Banaszak Holl<sup>4\*</sup>

<sup>1</sup>Chemistry Department, University of Michigan, Ann Arbor, MI 48109, United States

<sup>2</sup>Ecology and Evolutionary Biology, University of Michigan, Ann Arbor, MI 48109, United States

<sup>3</sup>NOAA Great Lakes Environmental Research Laboratory, Lake Michigan Field Station, Muskegon, MI 49441, United States

<sup>4</sup>Chemical Engineering, Monash University, Clayton VIC 3800, Australia

\*corresponding authors: duhaimem@umich.edu, ashley.elgin@noaa.gov, mark.banaszakholl@monash.edu

<sup>a</sup>Contributed equally to manuscript

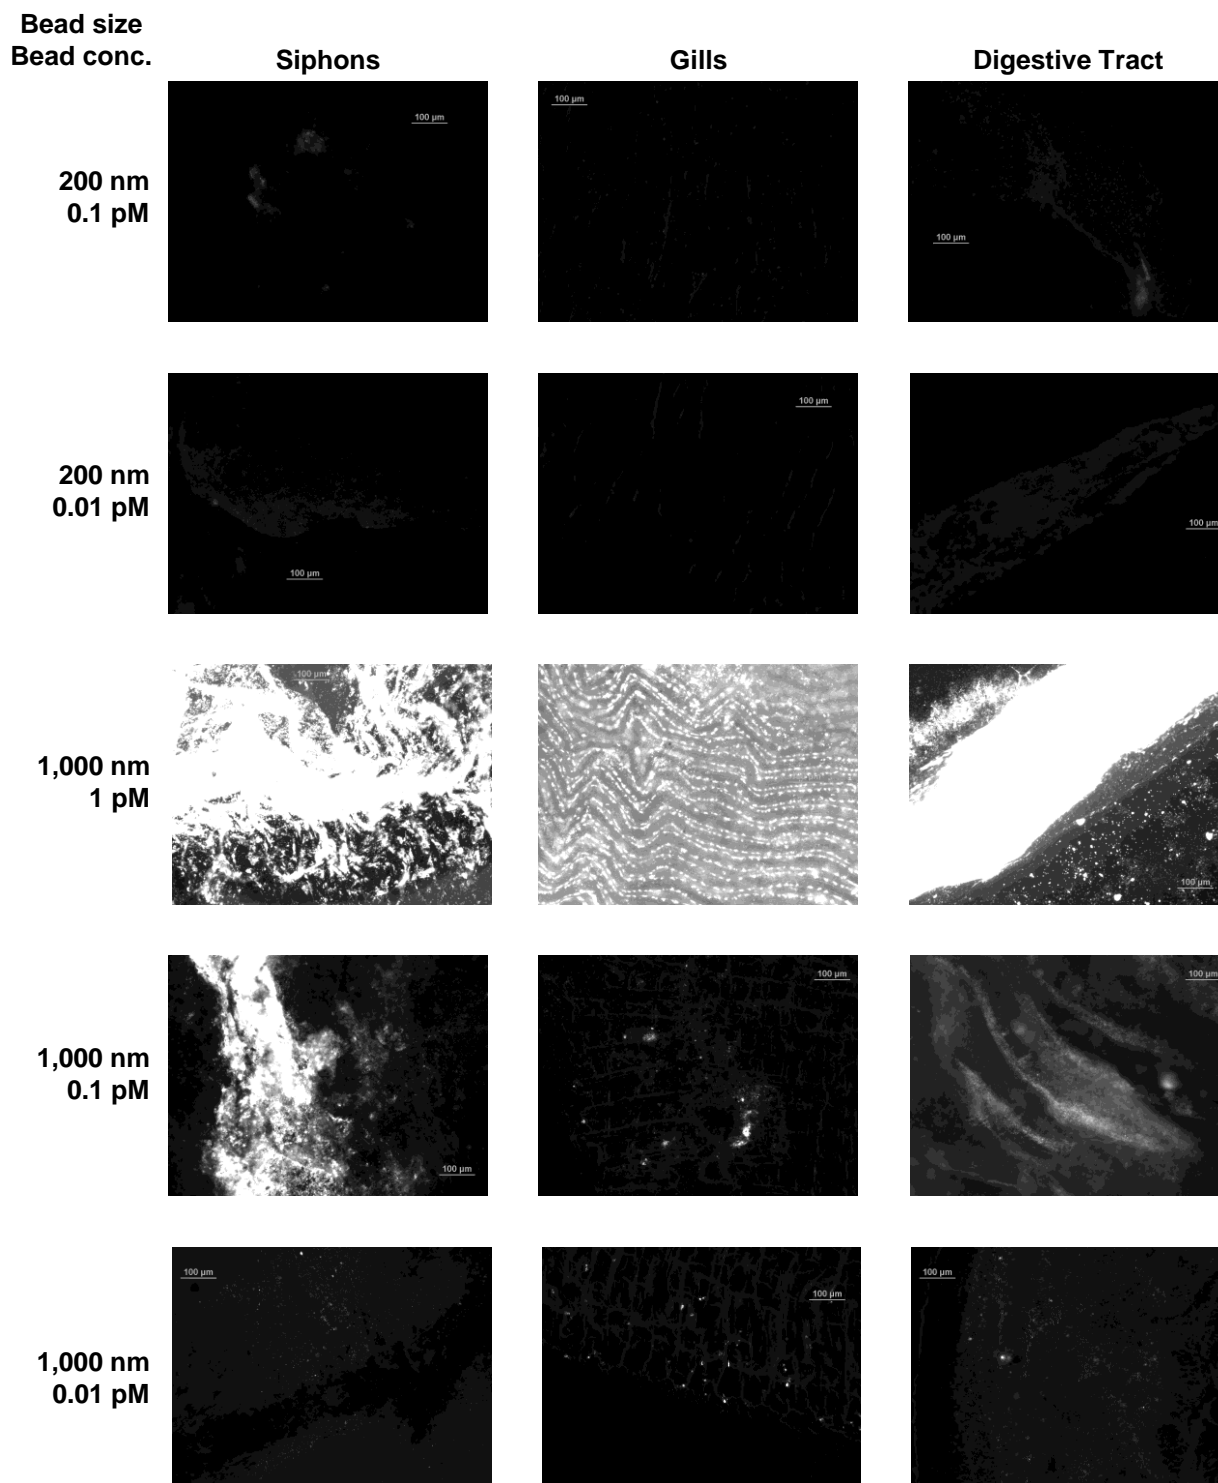

**Figure S1.** Fluorescence microscopy images of dissected mussel organs following 24 hour uptake studies with carboxylic acid-terminated PS beads containing a red dye.

**Recently reported marine microplastic concentrations:**

127,000-2,000,000 particles/km<sup>2</sup> in the Great Lakes

15,000-2,000,000 particles/km<sup>2</sup> (ave. = 700,000 particles/km<sup>2</sup> in the San Francisco Bay)

**Using 1,000,000 particles/km<sup>2</sup> as a general estimate, there are 0.01 particles/L of water**

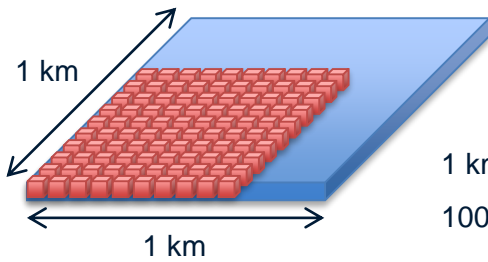

Consider the volume to arise from the number of liter volumes packed into a 1x1 km surface (effective sampling depth of 10 cm)

1 km = 10,000 1L cubes per side

100,000,000 1L cubes in 1 km<sup>2</sup>

| Count description | Particles/L | L/particle |
|-------------------|-------------|------------|
| <b>Average</b>    | <b>0.01</b> | <b>100</b> |
| Low               | 0.00015     | 6,667      |
| High              | 0.02        | 50         |

**Figure S2.** Calculations demonstrating how microplastic concentrations expressed in particles/km<sup>2</sup> were converted to particles/L. The table shows the calculations for how many liters of water would need to be collected to find one microplastic, based on the reported environmental concentrations.

**Assume one 50  $\mu\text{m}$  (50,000 nm) particle per liter**

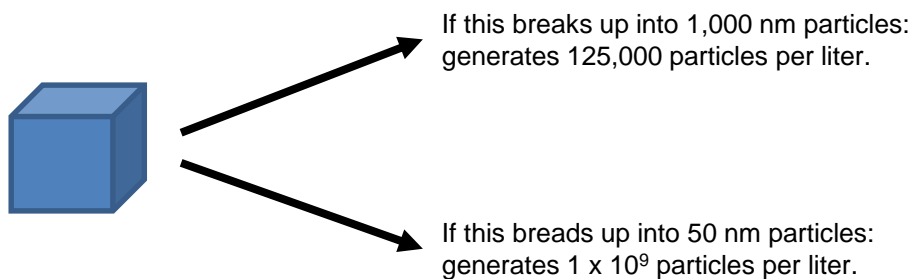

**Figure S3.** Schematic estimating local concentrations of nanoplastics that could be produced from the degradation and fragmentation of microplastics.

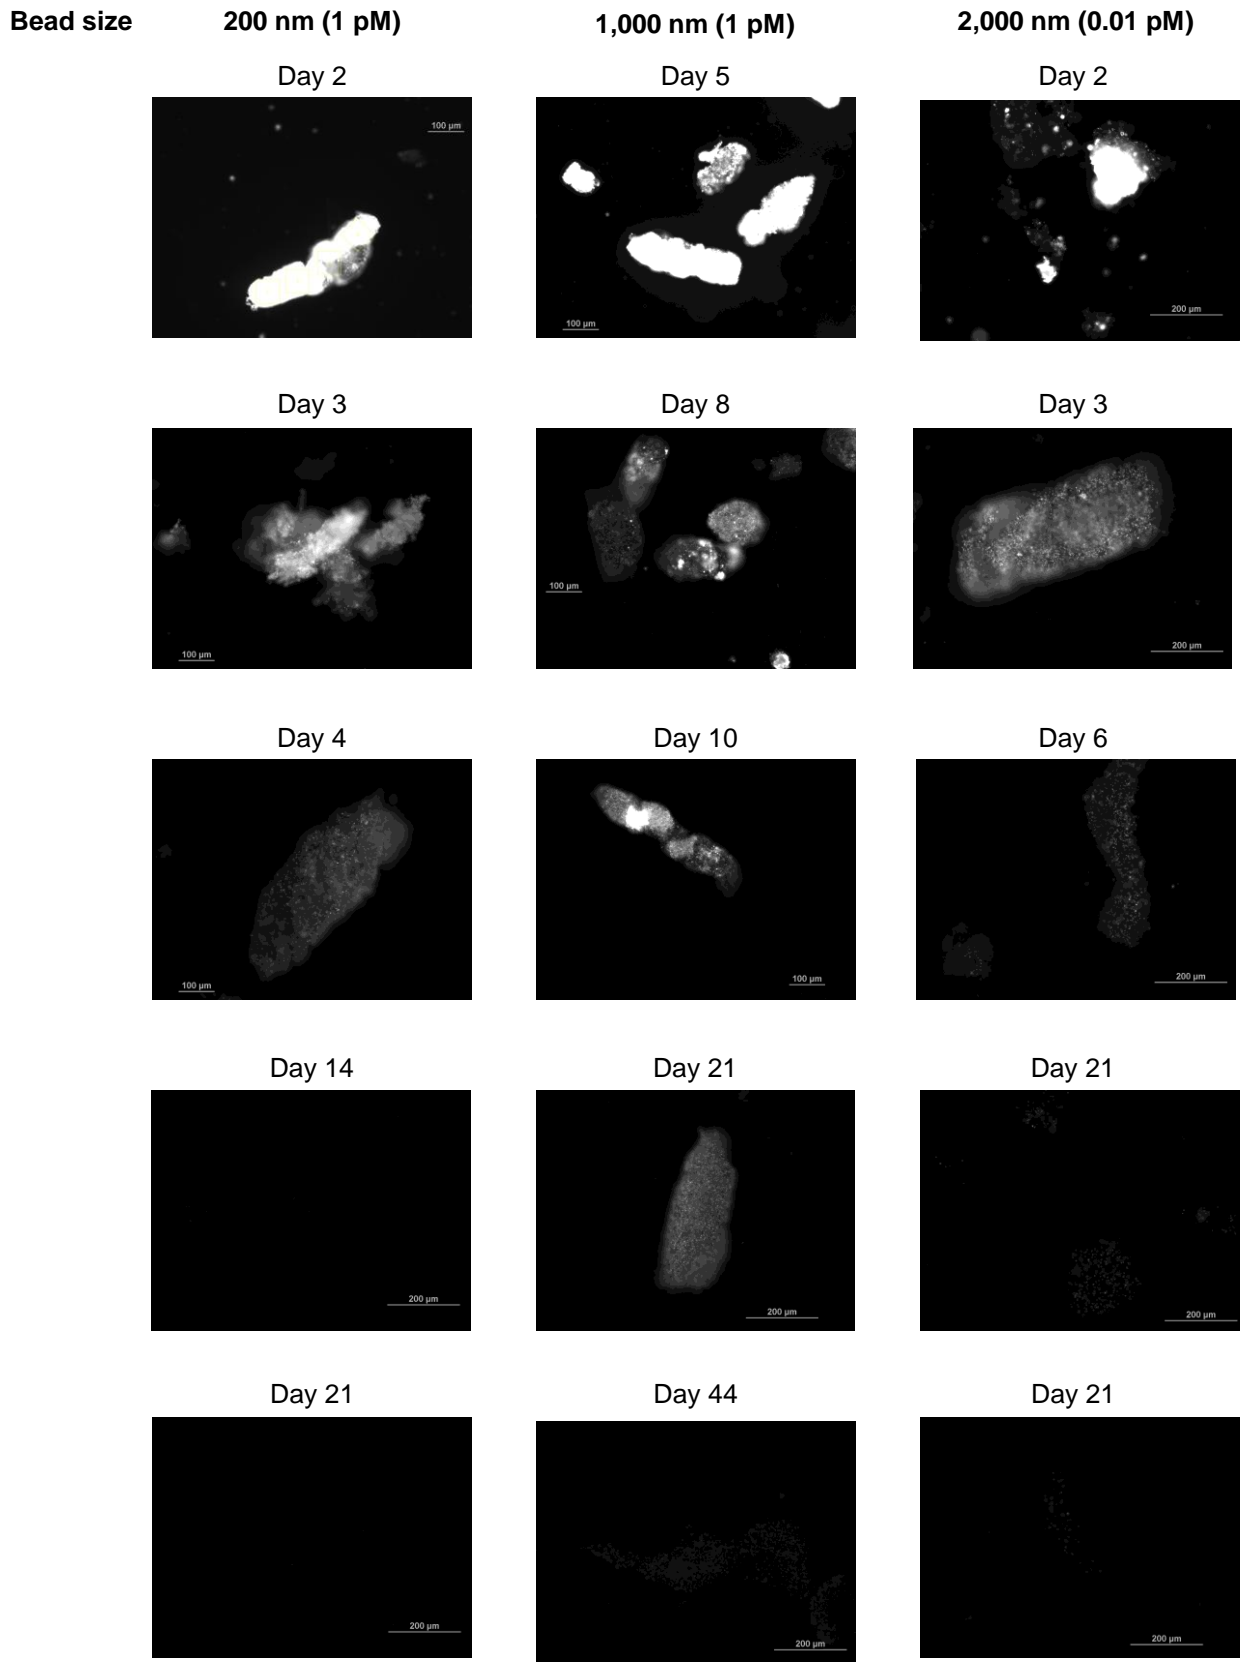

**Figure S4.** Fluorescence microscopy images of mussel feces following dosing with PS beads containing a red dye. The mussels were dosed for 24 hours and then given time to clear the ingested beads.

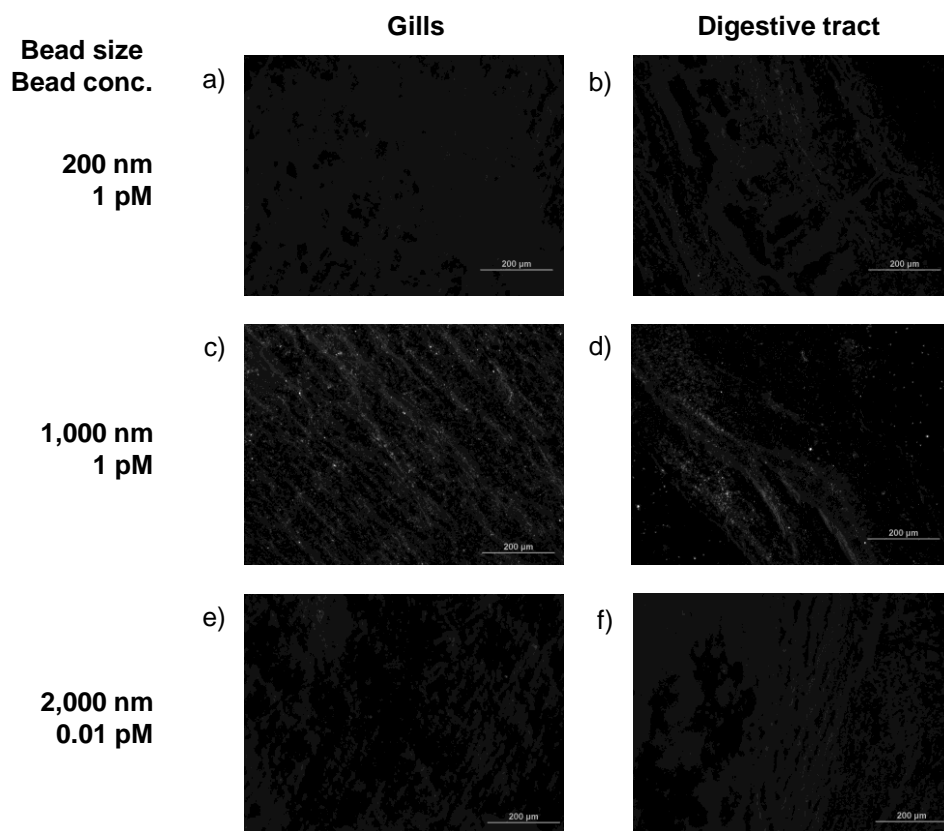

**Figure S5.** Fluorescence images of quagga mussel gills and digestive tract after mussels were dosed with carboxylic acid-terminated PS beads containing a red dye and allowed to clear until their feces were no longer fluorescent.

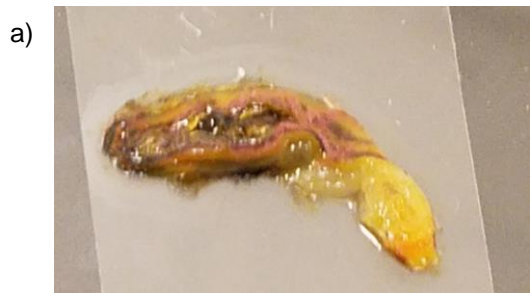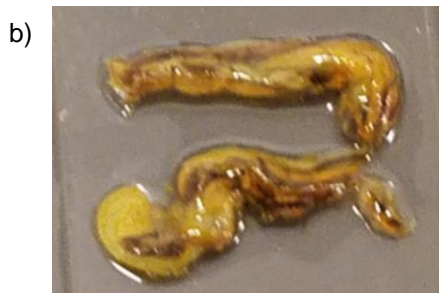

**Figure S6.** a) Dissected siphon from a mussel dosed with 1,000 nm beads containing a red dye. Following 24 hours of exposure, the mussel was allowed to clear the beads for 14 days before being dissected; b) Dissected siphon of a control (non-dosed) mussel.



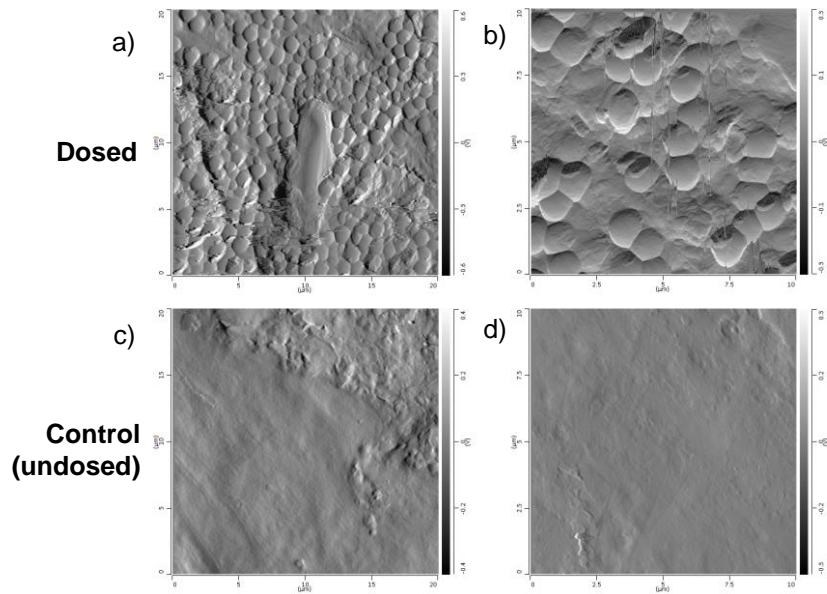

**Figure S7.** a) 20 x 20  $\mu\text{m}$  and b) 10 x 10  $\mu\text{m}$  AFM deflection images of 1,000 nm beads in a mussel siphon; c) 20 x 20  $\mu\text{m}$  and d) 10 x 10  $\mu\text{m}$  deflection images of control (non-dosed) mussel siphons.

**Table S1.** Summary of results from fluorescence spectroscopy studies quantifying the number of carboxylate-terminated PS beads mussels ingested in 24 hours. Bead concentrations were 1 pM for 200 and 1,000 nm beads and 0.01 pM for 2,000 nm beads.

| Bead diameter (nm) (conc.) | Mussel | Number of beads taken up in 24 hours |
|----------------------------|--------|--------------------------------------|
| 200 (1 pM)                 | A-1    | $1 \times 10^{10}$                   |
|                            | A-2    | $2 \times 10^8$                      |
| 1,000 (1 pM)               | B-1    | $1 \times 10^9$                      |
|                            | B-2    | $5 \times 10^8$                      |
|                            | B-3    | $2 \times 10^8$                      |
| 2,000 (0.01 pM)            | C-1    | $1 \times 10^7$                      |
|                            | C-2    | $1 \times 10^7$                      |
|                            | C-3    | $1 \times 10^7$                      |

**Table S2.** Summary of fluorescence spectroscopy studies quantifying the number of PS beads retained in the mussels after being given time to clear the beads.

| Bead diameter (nm) | Mussel            | Days allowed to clear | Ave. number beads remaining in mussels |
|--------------------|-------------------|-----------------------|----------------------------------------|
| 200                | D-1               | 21                    | 1x10 <sup>8</sup>                      |
|                    | D-2               |                       | 6x10 <sup>7</sup>                      |
|                    | E-1               | 17                    | 5x10 <sup>7</sup>                      |
|                    | E-2               |                       | 1x10 <sup>7</sup>                      |
|                    | E-3               |                       | 2x10 <sup>7</sup>                      |
| 1,000              | F-1               | 44                    | 3x10 <sup>7</sup>                      |
|                    | F-2               |                       | 3x10 <sup>7</sup>                      |
|                    | G-1 <sup>b</sup>  | 49                    | 6x10 <sup>7</sup>                      |
|                    | G-2 <sup>b</sup>  |                       | 4x10 <sup>7</sup>                      |
|                    | G-3 <sup>b</sup>  |                       | Died on day 44-46                      |
|                    | H-1 <sup>b</sup>  | 49                    | 1x10 <sup>8</sup>                      |
|                    | H-2 <sup>b</sup>  |                       | 7x10 <sup>7</sup>                      |
| H-3 <sup>b</sup>   | 1x10 <sup>8</sup> |                       |                                        |
| 2,000 (0.01 pM)    | I-1               | 20                    | 4x10 <sup>5</sup>                      |
|                    | I-2               |                       | 6x10 <sup>5</sup>                      |
|                    | I-3               |                       | 1x10 <sup>5</sup>                      |

<sup>a</sup>Mussel was not dissected before digesting and quantifying the number of beads

<sup>b</sup>Replicates B&C were carried out at the same time but as separate trials in different beakers

**Table S3.** Summary of fluorescence spectroscopy studies quantifying the number of PS beads taken up into the mussels after 3 days of exposure to an excess of beads

| Bead diameter (nm) | Nominal bead conc. (pM)               | Total number beads added | Mussel | # beads in mussel | Conc. of beads in mussel (pM) |
|--------------------|---------------------------------------|--------------------------|--------|-------------------|-------------------------------|
| 1,000              | 1                                     | $1.2 \times 10^{11}$     | J-1    | $2 \times 10^9$   | 1.3                           |
|                    |                                       |                          | J-2    | $1 \times 10^9$   | 0.3                           |
|                    |                                       |                          | J-3    | $2 \times 10^9$   | 1.2                           |
|                    | 0.1                                   | $1.2 \times 10^{10}$     | K-1    | $2 \times 10^8$   | 0.1                           |
|                    |                                       |                          | K-2    | $1 \times 10^8$   | 0.3                           |
|                    |                                       |                          | K-3    | $7 \times 10^8$   | 0.7                           |
|                    | 0.3 (0.1 pM added at 0, 24, 48 hrs)   | $3.6 \times 10^{10}$     | L-1    | $4 \times 10^8$   | 0.2                           |
|                    |                                       |                          | L-2    | $3 \times 10^9$   | 2.2                           |
|                    |                                       |                          | L-3    | $4 \times 10^8$   | 0.3                           |
| 2,000              | 0.03 (0.01 pM Added at 0, 24, 48 hrs) | $3.6 \times 10^9$        | M-1    | $1 \times 10^8$   | 0.08                          |
|                    |                                       |                          | M-2    | $3 \times 10^7$   | 0.02                          |
